# Supplementary material for: Dual Carbonic Anhydrase IX/XII Inhibitors and Carbon Monoxide Releasing Molecules Modulate LPS-Mediated Inflammation in Mouse Macrophages
Source: PubMed Central journal article supplement (PMC7824903; doi:10.3390/antiox10010056), 2021-01-05
Supplement: antioxidants-10-00056-s001.pdf [file antioxidants-10-00056-s001.pdf]

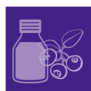

Supplementary Material

## Dual carbonic anhydrase IX/XII inhibitors and Carbon Monoxide Releasing Molecules modulate LPS-mediated inflammation in mouse macrophages

Emanuela Berrino<sup>a</sup>, Simone Carradori<sup>b,\*</sup>, Andrea Angeli<sup>a,c</sup>, Fabrizio Carta<sup>a</sup>, Claudiu T. Supuran<sup>a</sup>, Paolo Guglielmi<sup>d</sup>, Cecilia Coletti<sup>b</sup>, Roberto Paciotti<sup>b</sup>, Helmut Schweikl<sup>e</sup>, Francesca Maestrelli<sup>f</sup>, Elisabetta Cerbai<sup>a</sup> and Marialucia Gallorini<sup>b,e</sup>

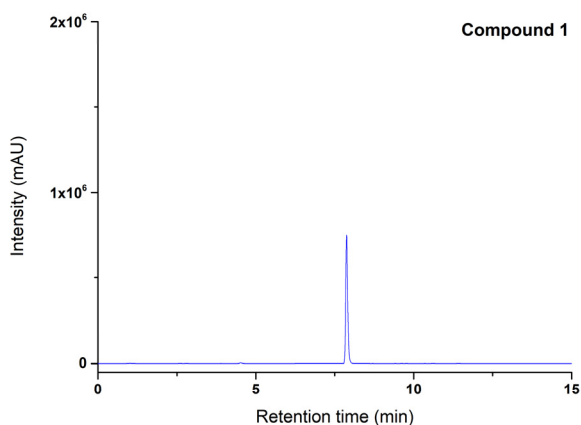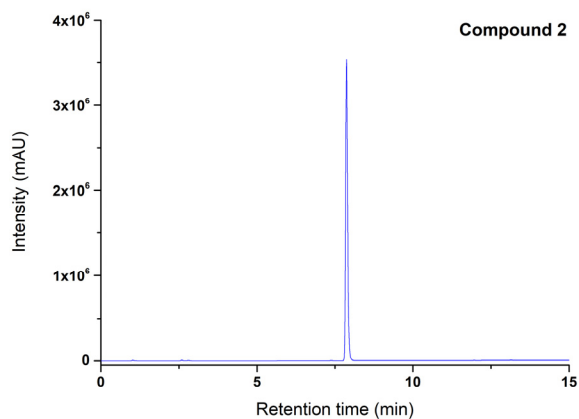

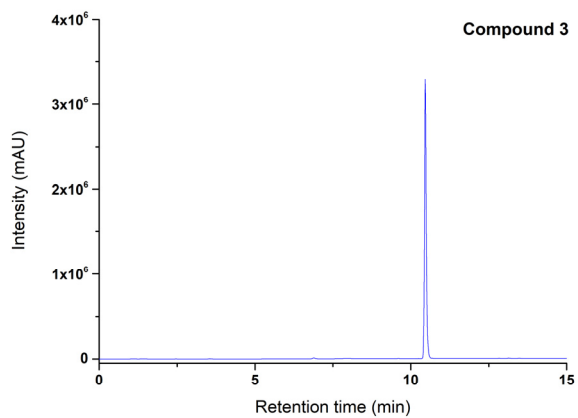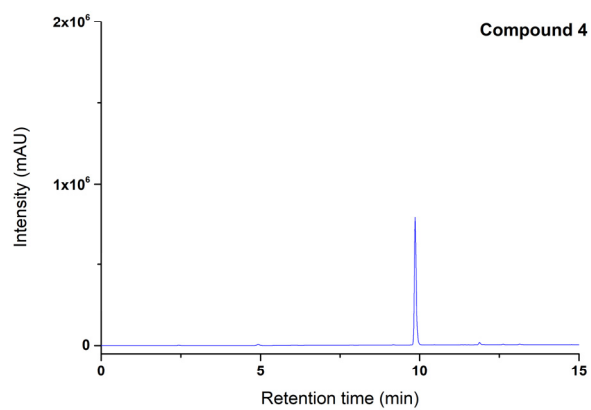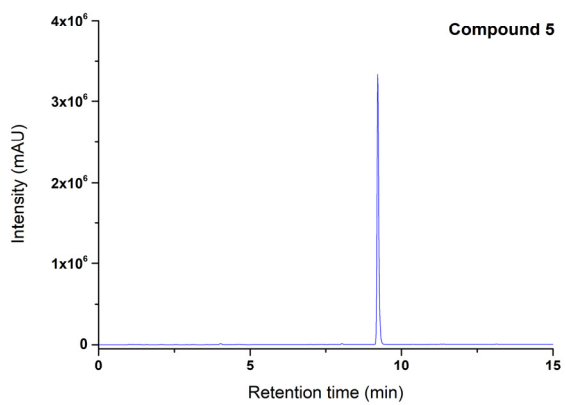

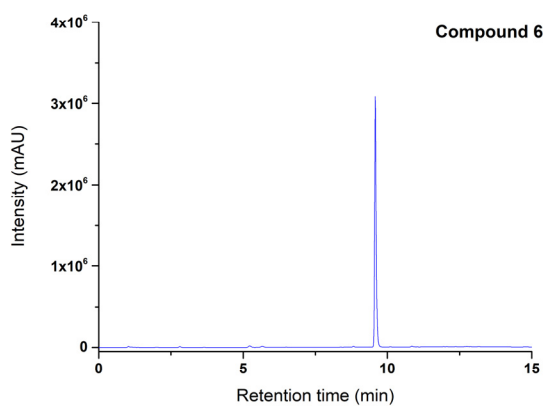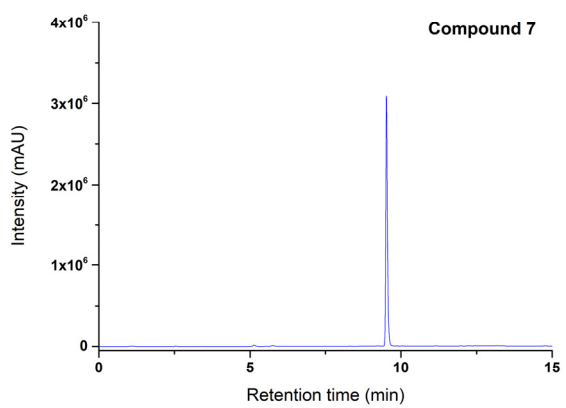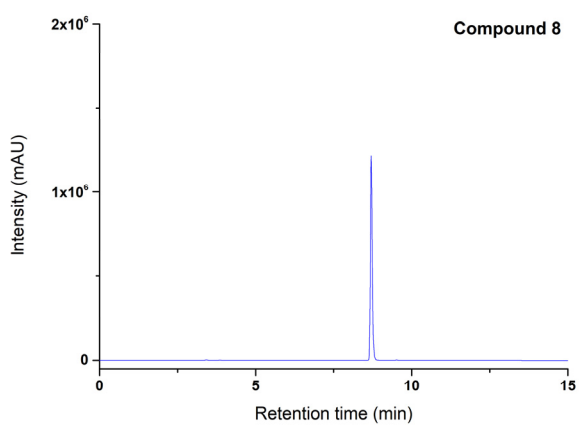

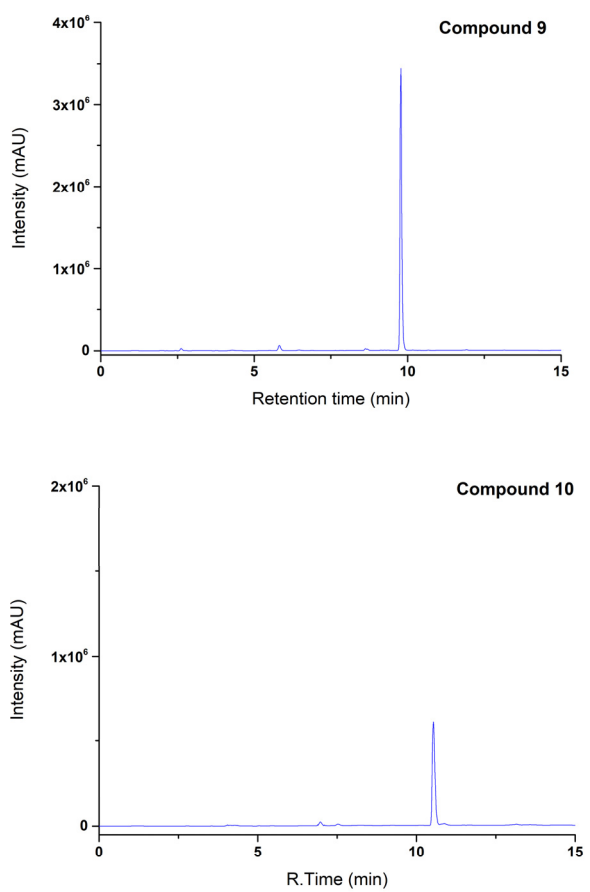

**Figure S1.** Chromatograms (HPLC) of compounds 1-10.

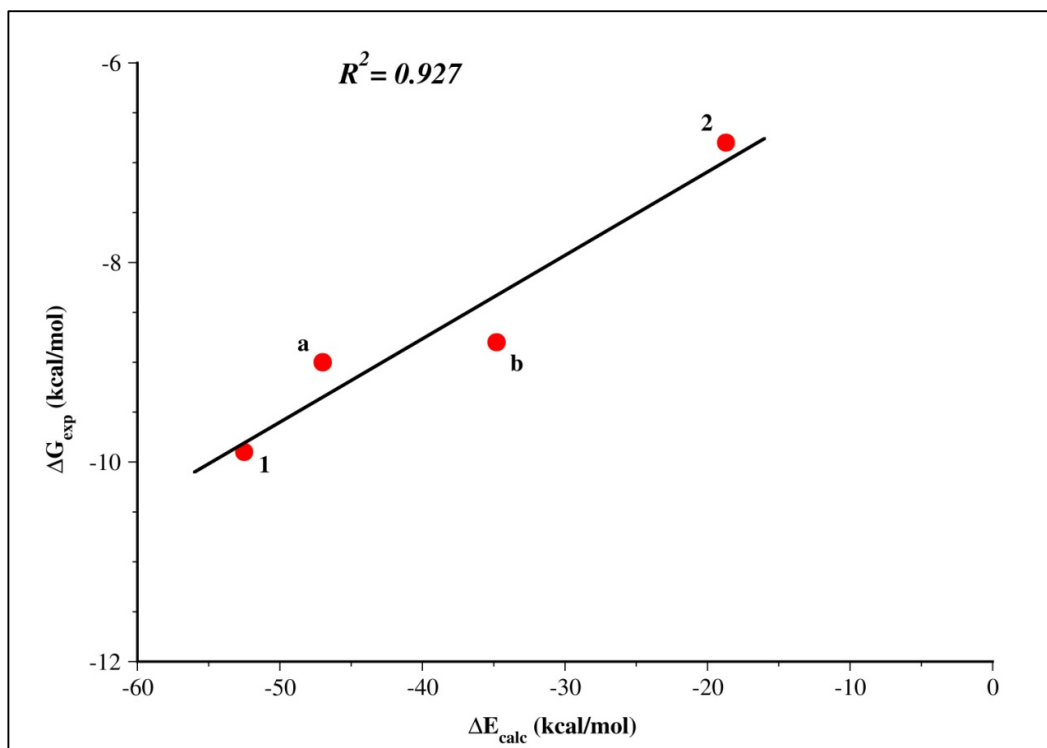

**Figure S2.** Correlation between  $\Delta E_{\text{calc}}$  and  $\Delta G_{\text{exp}}$  values, defined for complexes of hCA IX-mimic with **a**, **b**, **1** and **2**.

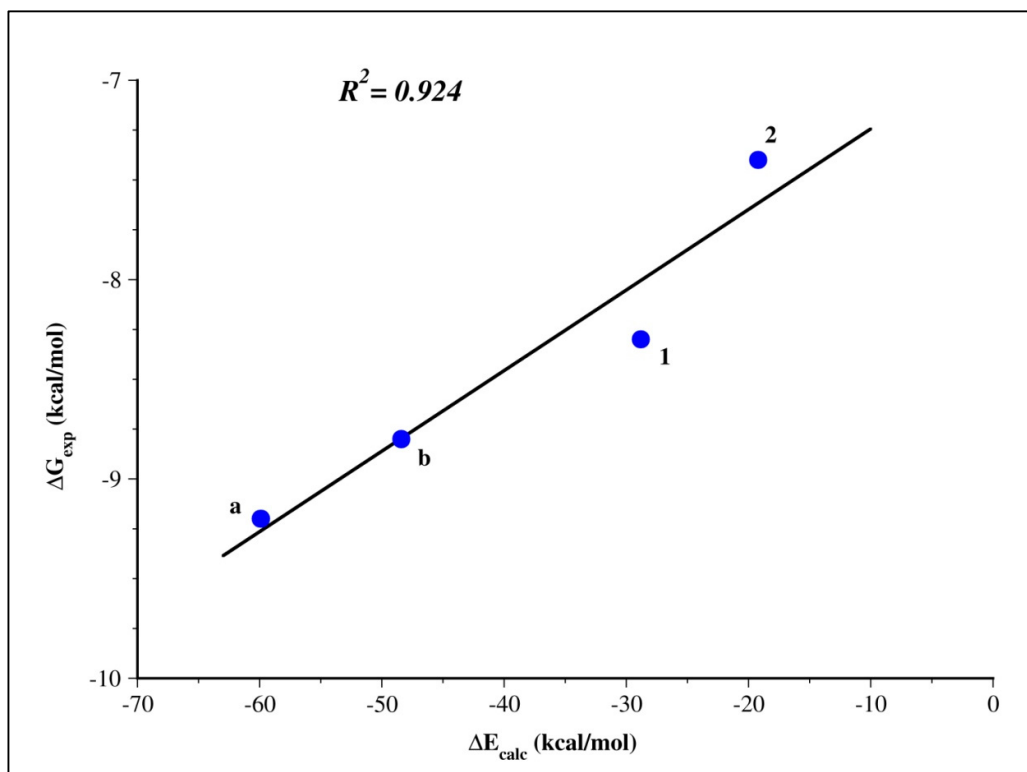

**Figure S3.** Correlation between  $\Delta E_{\text{calc}}$  and  $\Delta G_{\text{exp}}$  values, defined for complexes of hCA XII with **a**, **b**, **1** and **2**.

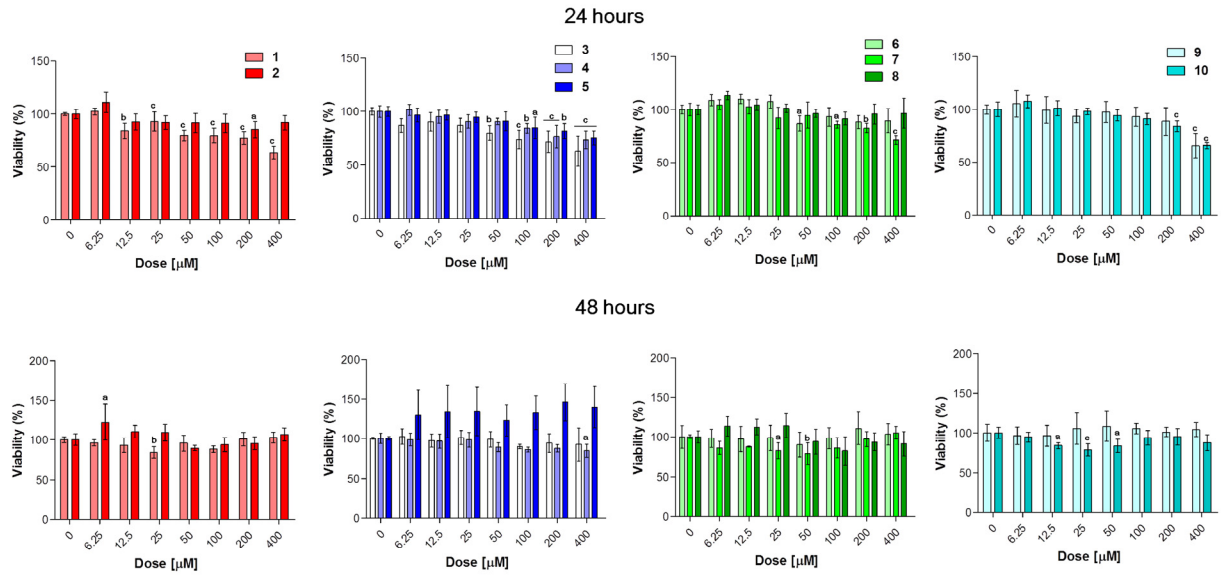

**Figure S4.** Cell metabolic activity of RAW 264.7 mouse macrophages in the presence of increasing concentrations (0-400  $\mu\text{M}$ ) of compounds 1-10. Data shown are the means  $\pm$  S.D. of six replicates and are expressed as percentages of untreated cultures (0  $\mu\text{M}$ ) set as 100% (a =  $p < 0.05$  between compounds and untreated cells; b =  $p < 0.01$  between compounds and untreated cells; c =  $p < 0.001$  between compounds and untreated cells).

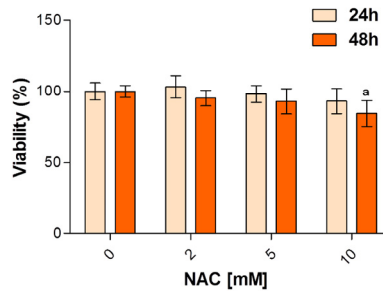

**Figure S5.** Cell metabolic activity of RAW 264.7 mouse macrophages in the presence of increasing concentrations (0-10 mM) of NAC. Data shown are the means  $\pm$  S.D. of six replicates and are expressed as percentages of untreated cultures (0 mM) set as 100% (a =  $p < 0.05$  between NAC and untreated cells).

**Table S1.** Inhibition data against hCA I, hCA II, hCA IX and hCA XII of propargylated precursors and the standard sulfonamide inhibitor acetazolamide (AAZ) by a Stopped-Flow CO<sub>2</sub> hydrase assay.

| compound              | <i>K<sub>I</sub></i> (nM) <sup>a</sup> |         |         |         |
|-----------------------|----------------------------------------|---------|---------|---------|
|                       | hCA I                                  | hCA II  | hCA IX  | hCA XII |
| <b>a</b> <sup>b</sup> | >100000                                | >100000 | 252.0   | 178.0   |
| <b>b</b>              | >100000                                | >100000 | 358.0   | 378.0   |
| <b>c</b>              | >100000                                | >100000 | >100000 | >100000 |
| <b>d</b>              | >100000                                | >100000 | >100000 | >100000 |
| <b>e</b>              | >100000                                | >100000 | >100000 | >100000 |
| <b>f</b>              | >100000                                | >100000 | 695.0   | 4920    |
| <b>g</b>              | >100000                                | >100000 | 315.5   | 353.0   |
| <b>h</b>              | >100000                                | >100000 | >100000 | >100000 |
| <b>i</b>              | >100000                                | >100000 | >100000 | >100000 |
| <b>l</b>              | >100000                                | >100000 | >100000 | >100000 |
| <b>AAZ</b>            | 250                                    | 12.1    | 25.8    | 5.7     |

<sup>a</sup>Mean value from three independent assays (errors were in the range of  $\pm 5$ -10%). <sup>b</sup>from ref. (De Monte, C; Carradori, S; Secci, D; D'Ascenzio, M; Vullo, D; Ceruso, M; Supuran, CT. Cyclic tertiary sulfamates: Selective inhibition of the tumor-associated carbonic anhydrases IX and XII by *N*- and *O*-substituted acesulfame derivatives. *Eur. J. Med. Chem.* 2014, *84*, 240-246).

**Table S2.** calculated binding energies in solution,  $\Delta E_{\text{calc}}$ , and experimental free energies,  $\Delta G_{\text{exp}}$ , for hCA IX-mimic and hCA XII, with **1** and **2** and their propargyl precursors, **a** and **b**. R<sup>2</sup> values are also provided.

| Molecule       | hCA IX                     |                           |                        | hCA XII                    |                           |                        |
|----------------|----------------------------|---------------------------|------------------------|----------------------------|---------------------------|------------------------|
|                | * $\Delta E_{\text{calc}}$ | * $\Delta G_{\text{exp}}$ | # <i>K<sub>I</sub></i> | * $\Delta E_{\text{calc}}$ | * $\Delta G_{\text{exp}}$ | # <i>K<sub>I</sub></i> |
| <b>a</b>       | -47.0                      | -9.0                      | 252                    | -59.9                      | -9.2                      | 178                    |
| <b>1</b>       | -52.5                      | -9.9                      | 56.3                   | -28.8                      | -8.3                      | 788.4                  |
| <b>b</b>       | -34.8                      | -8.8                      | 358                    | -48.4                      | -8.8                      | 378                    |
| <b>2</b>       | -18.7                      | -6.8                      | 10000                  | -19.2                      | -7.4                      | 3462                   |
| R <sup>2</sup> | 0.927                      |                           |                        | 0.924                      |                           |                        |

\*Energy values in kcal/mol; \**K<sub>I</sub>* in nM.
